# Supplementary material for: In vitro amplification of pathogenic tau conserves disease-specific bioactive characteristics
Source: Acta Neuropathol. 2021 Jan 1;141(2):193–215. doi: 10.1007/s00401-020-02253-4 (PMC7847465; doi:10.1007/s00401-020-02253-4)
Supplement: Supplementary file 7 — Supplementary file7 Antibodies used in the study (XLSX 12 KB) [file 401_2020_2253_MOESM7_ESM.xlsx]

## Sheet: Sheet1
Antibody Name	Specificity	Host Species	Dilutions	Source	Validation
AT8	pTau (phosphorylated at Ser202 and Thr 205)	mouse monoclonal, IgG1	1:1000 (WB); 1:10000 (IHC); 1:2000 (IF); 1:200 (ImmunoEM)	Thermo Scientific, MN1020	https://www.fishersci.com/shop/products/anti-phospho-phf-tau-pser202-thr205-clone-at8/ENMN1020?ef_id=CjwKCAjwydP5BRBREiwA-qrCGpmC9y-cx3o5ManhZbHF5wvNKrwUpU4KdkJWIPU_g2nVT8TTsQXaAhoCCGIQAvD_BwE:G:s&cid=SEM_GAW_20190909_CB88IN&ppc_id=FisherSciNonbrand_goog_6492004464_80722830231_AntibodiesDSA_b_381598720312_17411229378813785733&s_kwcid=AL!4428!3!381598720312!b!!g!!&gclid=CjwKCAjwydP5BRBREiwA-qrCGpm…
PHF-1	pTau (phosphorylated at Ser396 and Ser404)	mouse monoclonal, IgG1	1:2000 (WB)	Gift from Dr. Peter Davies	https://pubmed.ncbi.nlm.nih.gov/1370450/
AT100	pTau (pSer212 and pThr214)	mouse monoclonal	1:1000 (ICC)	Thermo Scientific, MN1060	https://www.fishersci.com/shop/products/anti-phospho-phf-tau-pser212-thr214-clone-at100/enmn1060?searchHijack=true&searchTerm=ENMN1060&searchType=RAPID&matchedCatNo=ENMN1060
R2295M	Mouse tau	rabbit polyclonal	1:1000 (IF); 1:2000 (ICC); 1:2000 (WB)	In-house	https://pubmed.ncbi.nlm.nih.gov/27810929/
T49	Mouse tau	mouse monoclonal	1:1000 (ICC)	In-house	https://pubmed.ncbi.nlm.nih.gov/2483104/
DMR7	pathological tau	mouse monoclonal, IgG1	1:1000 (DB)	In-house	https://link.springer.com/article/10.1186/s13024-020-00404-5
MC1	pathological tau	mouse monoclonal, IgG1	1:2000 (DB)	Gift from Dr. Peter Davies	https://pubmed.ncbi.nlm.nih.gov/9130141/
CP13	pTau (phosphorylated at Ser202)	mouse monoclonal, IgG1	1: 2000 (IF)	Gift from Dr. Peter Davies	https://pubmed.ncbi.nlm.nih.gov/19710325/
17025	Recombinant human tau	rabbit polyclonal	1:5000 (WB)	In-house	https://pubmed.ncbi.nlm.nih.gov/10595524/
K9JA	Tau (aa 243-441)	rabbit polyclonal	1:5000 (WB)	Agilent; A002401-2	https://www.cosmobiousa.com/content/document/cosmo-bio-ltd/cac-tip-4rt-p01_anti-4r-tau-pab-rabbit-antiserum_datasheet_502.pdf
Anti-4R tau	4R Tau	rabbit polyclonal	1:5000 (WB); 1: 2000 (IF)	Cosmo Bio USA; TIP-4RT-P01	https://www.cosmobiousa.com/products/anti-4r-tau-pab
RD3	3R Tau	mouse monoclonal	1:10000 (IHC); 1: 2000 (IF)	Millipore; 05-803	https://www.emdmillipore.com/US/en/product/Anti-Tau-3-repeat-isoform-RD3-Antibody-clone-8E6-C11,MM_NF-05-803
GT38	AD pathological tau	mouse monoclonal	1:2000 (IHC)	abcam; ab246808	https://www.abcam.com/tau-alzheimers-disease-antibody-gt-38-conformation-specific-ab246808.html
Amyloid beta 42 (H31L21)	707-713aa	Rabbit polyclonal	1: 2000 (IF)	Thermo Scientific; 700254	https://www.thermofisher.com/antibody/product/beta-Amyloid-Antibody-clone-H31L21-Monoclonal/700254
17028	MAP2	rabbit polyclonal	1:1000 (ICC)	In-house	https://pubmed.ncbi.nlm.nih.gov/21982369/
anti-MAP2	MAP2	Chicken	1:5000 (ICC)	Millipore; AB5543	https://www.emdmillipore.com/US/en/product/Anti-MAP2-Antibody,MM_NF-AB5543?ReferrerURL=https%3A%2F%2Fwww.google.com%2F
anti-GAPDH	GAPDH	mouse monoclonal	1:5000 (WB)	Advanced Immunochemical; 2-RGM2	https://www.advimmuno.com/product/monoclonal-mouse-anti-rabbit-glyceraldehyde-3-phosphate-dehydrogenase-gapdh/
C-myc	myc tag	Rabbit polyclonal	1:200 (ImmunoEM)	Santa Cruz; sc-789	https://datasheets.scbt.com/sc-789.pdf
